# Supplementary material
Source: publisher figshare collection journal article supplement (https://asha.figshare.com/articles/dataset/_/14044055)
Supplement: Supplementary file 2 [file 1]

## **Supplemental Material S2.** Interview for childcare providers.

Thanks so much for chatting with me about the research study you completed! We will talk about which parts you like or don't like, how it compares to other work you have done with early interventionists, and what we could do differently in the future!

1. When you worked with the interventionist, she used a coaching approach that we call SS-OO-PP-RR where you planned together, practiced in routines, and then problem solved and planned at the end of each session. Tell me a little about your experiences with this approach.
  - a. How did the coaching together support you, or how could it have supported you better?
  - b. How did the coaching compare to other collaborations with early intervention providers (speech pathologists, other people who help support children in classrooms)?
  - c. We know that young children learn through everyday routines and activities, can you think of a time when you used the strategies you learned after the intervention ended?
2. The goal in the project was to help children learn to use gestures like pointing and showing more often to then help them learn words.
  - a. What did you notice about the strategies you used?
  - b. How do you think your children responded when you used the strategies?
3. Has participating in this work changed anything in your daily interactions with your children or parents at your center?
4. What changes could we make to better support teachers and children in child care centers as they learn language?
